# Supplementary material for: Co-Delivery of the Human NY-ESO-1 Tumor-Associated Antigen and Alpha-GalactosylCeramide by Filamentous Bacteriophages Strongly Enhances the Expansion of Tumor-Specific CD8+ T Cells
Source: MDPI journal article supplement (doi:10.3390/v15030672), 2023-03-02
Supplement: s1 [file s1]

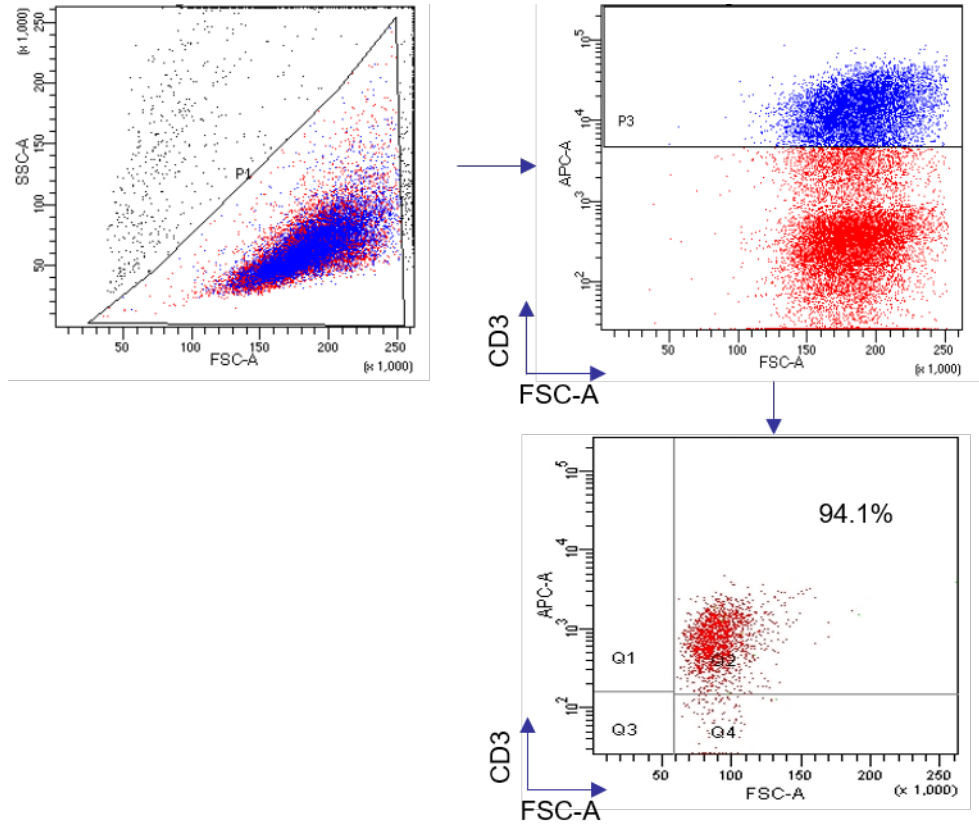

**Figure S1.** J76 NFAT-GFP 1G4 cell sorting. J76 NFAT-GFP cells were transduced with recombinant lentiviral particles encoding the NY-ESO-1 specific 1G4 TCR. 48 hours later, cells were stained with APC-conjugated anti-human CD3 and acquired by FACS. Cells with brighter CD3 signals (P3, blue) were gated and sorted. Sorted cells were then assayed for CD3 expression.

**A**

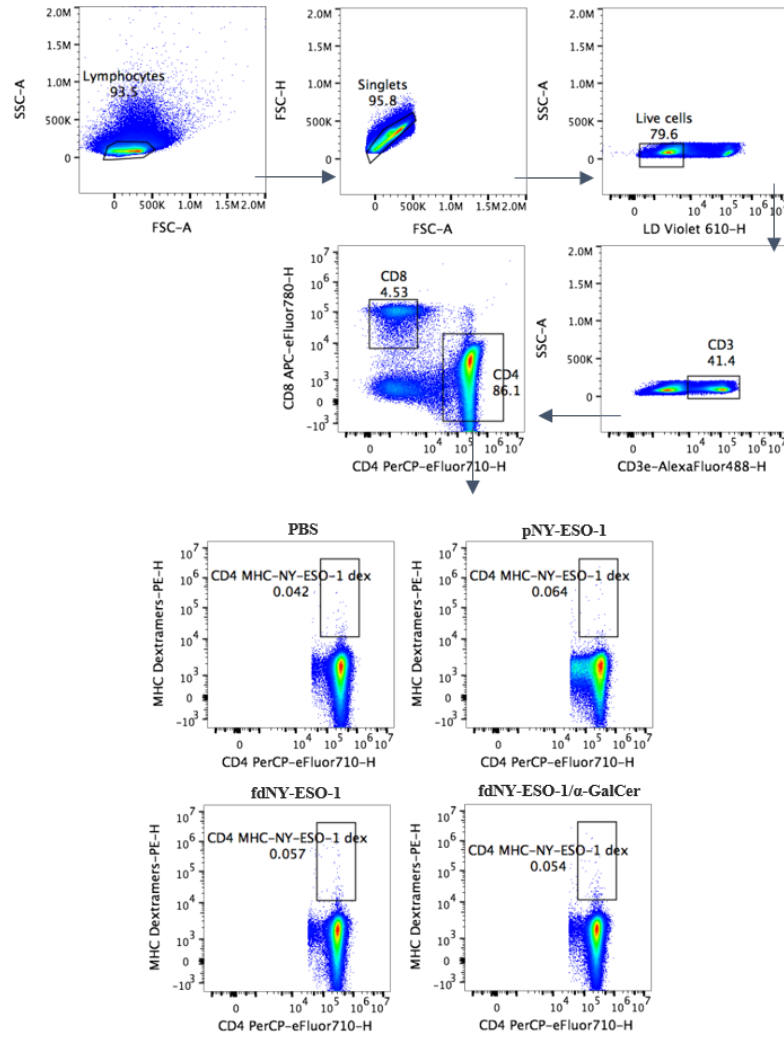

**B**

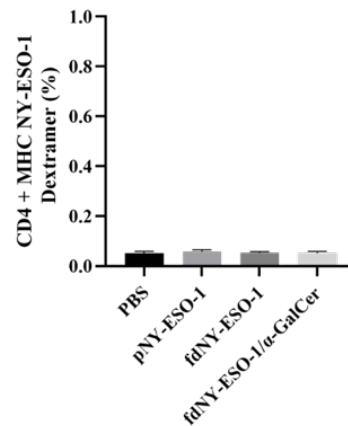

**Figure S2.** Analysis of MHC-I-NY-ESO-1-dextramers positive on CD4<sup>+</sup> T cells (A) Gating strategy of one representative sample. Lymphocytes and singlets were gated by dimension; then live cells were gated as negative for live-dead dye. Then CD3<sup>+</sup> T cells were gated on live cells and MHC-I NY-ESO-1-dextramer positive cells were shown as percentage on CD4<sup>+</sup> gated T cells. (B) Percentages of MHC-I NY-ESO-1-dextramer<sup>+</sup>/CD4<sup>+</sup> cells. Mean  $\pm$  SEM of 4 mice per group are shown.
